# Supplementary material for: A Scientific Approach for Environmental Analysis: An Asynchronous Electric Motor Case Study for Stand-By Applications
Source: MDPI journal article supplement (doi:10.3390/machines11080810), 2023-08-07
Supplement: s1 [file s1]

# **Supplementary Information:**

## **A Scientific Approach for Environmental Analysis: An Asynchronous Electric Motor Case Study for Stand-by Applications**

**Andrea Antonacci, Alessandro Giraldi, Eleonora Innocenti and Massimo Delogu \***

Department of Industrial Engineering, University of Florence, Via di S. Marta 3, 50139 Florence, Italy; andrea.antonacci@unifi.it (A.A.); alessandro.giraldi@unifi.it (A.G.); eleonora.innocenti@unifi.it (E.I.)

\* Correspondence: massimo.delogu@unifi.it; Tel.: +39-055-275-8769

**Table S1.** Brief description of ReCiPe midpoint indicators.

| ID | Indicator Name                  | Acronym             | Dimensional Unit          | Description                                                                                     |
|----|---------------------------------|---------------------|---------------------------|-------------------------------------------------------------------------------------------------|
| 1  | agricultural land occupation    | ALOP                | m <sup>2</sup> - year     | Amount of agricultural land occupied for a certain time                                         |
| 2  | climate change                  | GWP <sub>100</sub>  | kg CO <sub>2</sub> - Eq   | Assessment of global temperature increases because of greenhouse gas emissions                  |
| 3  | fossil depletion                | FDP                 | kg oil - Eq               | Reduction of fossil caused by primary extraction                                                |
| 4  | freshwater ecotoxicity          | FETP <sub>inf</sub> | kg 1,4-DCB - Eq           | Toxic effects of chemicals on freshwater causing biodiversity loss                              |
| 5  | freshwater eutrophication       | FEP                 | kg P - Eq                 | Excessive discharge of nutrients into freshwater                                                |
| 6  | human toxicity                  | HTP <sub>inf</sub>  | kg 1,4-DCB - Eq           | Toxic effects of chemicals on human health                                                      |
| 7  | ionising radiation              | IRP <sub>HE</sub>   | kg U235 - Eq              | Effect on human health of ionising radiation (radioactivity)                                    |
| 8  | marine ecotoxicity              | METP <sub>inf</sub> | kg 1,4-DB - Eq            | Equivalent toxic substances' impact on the marine ecosystem                                     |
| 9  | marine eutrophication           | MEP                 | kg N - Eq                 | Reaction of a marine ecosystem to an excessive availability of limiting nutrients               |
| 10 | metal depletion                 | MDP                 | kg Fe - Eq                | System demand for primary metal                                                                 |
| 11 | natural land transformation     | NLTP                | m <sup>2</sup>            | Amount of natural land transformed and occupied                                                 |
| 12 | ozone depletion                 | ODP <sub>inf</sub>  | kg CFC-11 - Eq            | Thinning of ozone layer caused by the release of chemical compounds                             |
| 13 | particulate matter formation    | PMFP                | kg PM10 - Eq              | Adverse impacts on human health caused by emissions of Particulate Matter (PM10)                |
| 14 | photochemical oxidant formation | POFP                | kg NMVOC - Eq             | Air pollutants formed by the action of sunlight on nitrogen oxides and reactive hydrocarbons    |
| 15 | terrestrial acidification       | TAP <sub>100</sub>  | kg SO <sub>2</sub> - Eq   | Changes in soil chemical properties following the deposition of nutrients in acidifying forms   |
| 16 | terrestrial ecotoxicity         | TETP <sub>inf</sub> | kg 1,4-DCB - Eq           | Effects of a chemical substance on terrestrial organisms and terrestrial plants                 |
| 17 | urban land occupation           | ULOP                | m <sup>2</sup> - year     | Level of spatial accumulation of activities for a certain time                                  |
| 18 | water depletion                 | WDP                 | m <sup>3</sup> water - Eq | Depletion of available water from lakes, rivers, or groundwater caused by industrial activities |

**Table S2.** Activities directly associated with Ecoinvent Database.

| LCI phase     | Activity                  | ECOINVENT ASSOCIATION (v.3.9)                                      |
|---------------|---------------------------|--------------------------------------------------------------------|
| Materials     | Cast Iron                 | market for cast iron (GLO)                                         |
|               | Aluminium, primary, ingot | market for aluminium, primary, ingot (RoW)                         |
|               | Copper                    | market for copper, cathode (GLO)                                   |
|               | Steel, low-alloy          | market for steel, low-alloy (GLO)                                  |
|               | Polyethylene, low density | market for polyethylene, high density, granulate (GLO)             |
|               | Cable Material            | -                                                                  |
|               | Material Mix              | market for steel, low-alloy (GLO)                                  |
|               | Epoxy resin, liquid       | market for epoxy resin production, liquid (RoW)                    |
|               | Extrusion, plastic film   | market for extrusion, plastic film (RoW)                           |
| Manufacturing | Sand Casting              | -                                                                  |
|               | Die Casting               | -                                                                  |
|               | Forging                   | market for forging, steel (GLO)                                    |
|               | Laser Cutting             | laser machining, metal, with CO2-laser, 4000W power (GLO)          |
|               | Hot rolling               | market for hot rolling, steel (GLO)                                |
|               | Cold rolling              | market for sheet rolling, steel (GLO)                              |
|               | Wire drawing              | market for wire drawing, copper (GLO)                              |
|               | Bending                   | -                                                                  |
|               | Turning                   | market for steel removed by turning, average, conventional (GLO)   |
|               | Drilling                  | market for steel removed by drilling, conventional (GLO)           |
|               | Milling                   | market for steel removed by milling, average (GLO)                 |
|               | Injection Moulding        | market for injection moulding (GLO)                                |
|               | Deep Drawing              | market for deep drawing, steel, 3500 kN press, single stroke (GLO) |
|               | Cable manufacturing       | -                                                                  |
|               | Mix manufacturing         | market for sheet rolling, steel (GLO)                              |
|               | Primer Painting           | -                                                                  |
|               | Epoxy Painting            | -                                                                  |
|               | Finishing Painting        | -                                                                  |

**Table S3.** Activities (user-defined processes) modeled with Ecoinvent Database.

| LCI phase     | Activity                  | ECOINVENT ASSOCIATION (v.3.9)                                                                                                                                                                  |
|---------------|---------------------------|------------------------------------------------------------------------------------------------------------------------------------------------------------------------------------------------|
| Materials     | Cast Iron                 | -                                                                                                                                                                                              |
|               | Aluminium, primary, ingot | -                                                                                                                                                                                              |
|               | Copper                    | -                                                                                                                                                                                              |
|               | Steel, low-alloy          | -                                                                                                                                                                                              |
|               | Polyethylene, low density | -                                                                                                                                                                                              |
|               | Cable Material            | market for cable, unspecified (GLO)—Extraction of Material Breakdown                                                                                                                           |
|               | Material Mix              | -                                                                                                                                                                                              |
| Manufacturing | Sand Casting              | market group for heat, central or small-scale, natural gas (GLO)—Energy Flow Associated with Activity<br>market group for electricity, high voltage (GLO)—Energy Flow Associated with Activity |
|               | Die Casting               | market group for heat, central or small-scale, natural gas (GLO)—Energy Flow Associated with Activity<br>market group for electricity, high voltage (GLO)—Energy Flow Associated with Activity |
|               | Forging                   | -                                                                                                                                                                                              |
|               | Laser Cutting             | -                                                                                                                                                                                              |
|               | Hot rolling               | -                                                                                                                                                                                              |
|               | Cold rolling              | -                                                                                                                                                                                              |
|               | Wire drawing              | -                                                                                                                                                                                              |
|               | Bending                   | market group for electricity, high voltage (GLO)—Energy Flow Associated with Activity                                                                                                          |
|               | Turning                   | -                                                                                                                                                                                              |
|               | Drilling                  | -                                                                                                                                                                                              |
|               | Milling                   | -                                                                                                                                                                                              |
|               | Injection Moulding        | -                                                                                                                                                                                              |
|               | Deep Drawing              | -                                                                                                                                                                                              |
|               | Cable manufacturing       | market for cable, unspecified (GLO)—Extraction of Manufacturing Stage                                                                                                                          |
|               | Mix manufacturing         | -                                                                                                                                                                                              |
|               | Primer Painting           | Primer—InterZinc 52—Modeling associated with specific datasheet                                                                                                                                |
|               | Epoxy Painting            | Intermediate—Intergard 475HS MIO—Modeling associated with specific datasheet                                                                                                                   |
|               | Finishing Painting        | Finishing—Interthane 990—Modeling associated with specific datasheet                                                                                                                           |

**Table S4:** Table showing 10 out of all 18 ReCiPe impact category outcomes for each AEM's components.

| Sub-Assembly/Components |                                       | ReCiPe Midpoint (H) 1.13 |              |                |       |                |              |               |             |                 |           |
|-------------------------|---------------------------------------|--------------------------|--------------|----------------|-------|----------------|--------------|---------------|-------------|-----------------|-----------|
|                         |                                       | FEP                      | IRPHE        | METPinf        | NLTP  | ODPinf         | PMFP         | POFP          | TAP100      | TETPinf         | ULOP      |
|                         |                                       | kg P - Eq                | kg U235 - Eq | kg 1,4-DB - Eq | m2    | kg CFC-11 - Eq | kg PM10 - Eq | kg NMVOC - Eq | kg SO2 - Eq | kg 1,4-DCB - Eq | m2 - year |
| STATOR                  | Stator Core Laminations               | 0.11                     | 18.47        | 11.52          | -0.02 | 0.0000075      | 0.74         | 0.95          | 0.83        | 0.02            | 2.32      |
|                         | Wirings—Filaments                     | 0.69                     | 12.43        | 307.70         | -0.10 | 0.0000048      | 2.02         | 1.64          | 6.69        | 0.24            | 12.64     |
|                         | Wirings—Insulation                    | 0.00                     | 0.27         | 0.09           | 0.00  | 0.0000005      | 0.01         | 0.01          | 0.01        | 0.00            | 0.03      |
| ROTOR                   | Rotor Squirrel Cage                   | 0.05                     | 2.39         | 1.81           | -0.01 | 0.0000037      | 0.35         | 0.48          | 0.72        | 0.00            | 0.90      |
|                         | Rotor Core Laminations                | 0.05                     | 9.27         | 5.28           | -0.01 | 0.0000034      | 0.33         | 0.43          | 0.39        | 0.01            | 1.04      |
|                         | Rotor Shaft                           | 0.03                     | 3.81         | 3.99           | -0.01 | 0.0000028      | 0.25         | 0.32          | 0.26        | 0.02            | 1.53      |
|                         | Key Shaft                             | 0.00                     | 0.02         | 0.02           | 0.00  | 0.0000000      | 0.00         | 0.00          | 0.00        | 0.00            | 0.00      |
|                         | Fan                                   | 0.01                     | 2.25         | 0.30           | 0.00  | 0.0000011      | 0.07         | 0.09          | 0.08        | 0.00            | 0.18      |
|                         | Fan Clamps                            | 0.00                     | 0.01         | 0.01           | 0.00  | 0.0000000      | 0.00         | 0.00          | 0.00        | 0.00            | 0.00      |
|                         |                                       |                          |              |                |       |                |              |               |             |                 |           |
| FRAME                   | Electric Motor Case                   | 0.08                     | 17.49        | 2.54           | -0.01 | 0.0000084      | 0.55         | 0.67          | 0.65        | 0.02            | 1.46      |
|                         | Flange Drive End Shield               | 0.06                     | 12.99        | 1.97           | -0.01 | 0.0000063      | 0.41         | 0.50          | 0.49        | 0.02            | 1.14      |
|                         | Non Drive End Endshield               | 0.04                     | 8.95         | 1.25           | -0.01 | 0.0000043      | 0.28         | 0.34          | 0.33        | 0.01            | 0.72      |
|                         | Terminal Box                          | 0.01                     | 2.44         | 0.38           | 0.00  | 0.0000012      | 0.08         | 0.09          | 0.09        | 0.00            | 0.22      |
|                         | Grease Fitting                        | 0.00                     | 0.01         | 0.00           | 0.00  | 0.0000000      | 0.00         | 0.00          | 0.00        | 0.00            | 0.00      |
|                         | Grease Fitting Protection             | 0.00                     | 0.00         | 0.00           | 0.00  | 0.0000000      | 0.00         | 0.00          | 0.00        | 0.00            | 0.00      |
|                         | Bearing Drive End Shield              | 0.00                     | 0.56         | 0.47           | 0.00  | 0.0000004      | 0.03         | 0.04          | 0.03        | 0.00            | 0.15      |
|                         | Bearing Non Drive End Endshield       | 0.00                     | 0.56         | 0.47           | 0.00  | 0.0000004      | 0.03         | 0.04          | 0.03        | 0.00            | 0.15      |
|                         | Fan Cover                             | 0.02                     | 2.84         | 1.60           | -0.01 | 0.0000020      | 0.16         | 0.22          | 0.17        | 0.02            | 0.90      |
|                         | Drip Cover                            | 0.01                     | 0.93         | 0.35           | 0.00  | 0.0000007      | 0.07         | 0.09          | 0.07        | 0.00            | 0.20      |
|                         |                                       |                          |              |                |       |                |              |               |             |                 |           |
|                         |                                       |                          |              |                |       |                |              |               |             |                 |           |
| MIX                     | Cables                                | 0.07                     | 1.46         | 33.03          | -0.01 | 0.0000006      | 0.22         | 0.18          | 0.73        | 0.03            | 1.38      |
|                         | Miscellaneous (Gaskets, Screws, etc.) | 0.00                     | 0.33         | 0.41           | 0.00  | 0.0000002      | 0.02         | 0.02          | 0.02        | 0.00            | 0.07      |

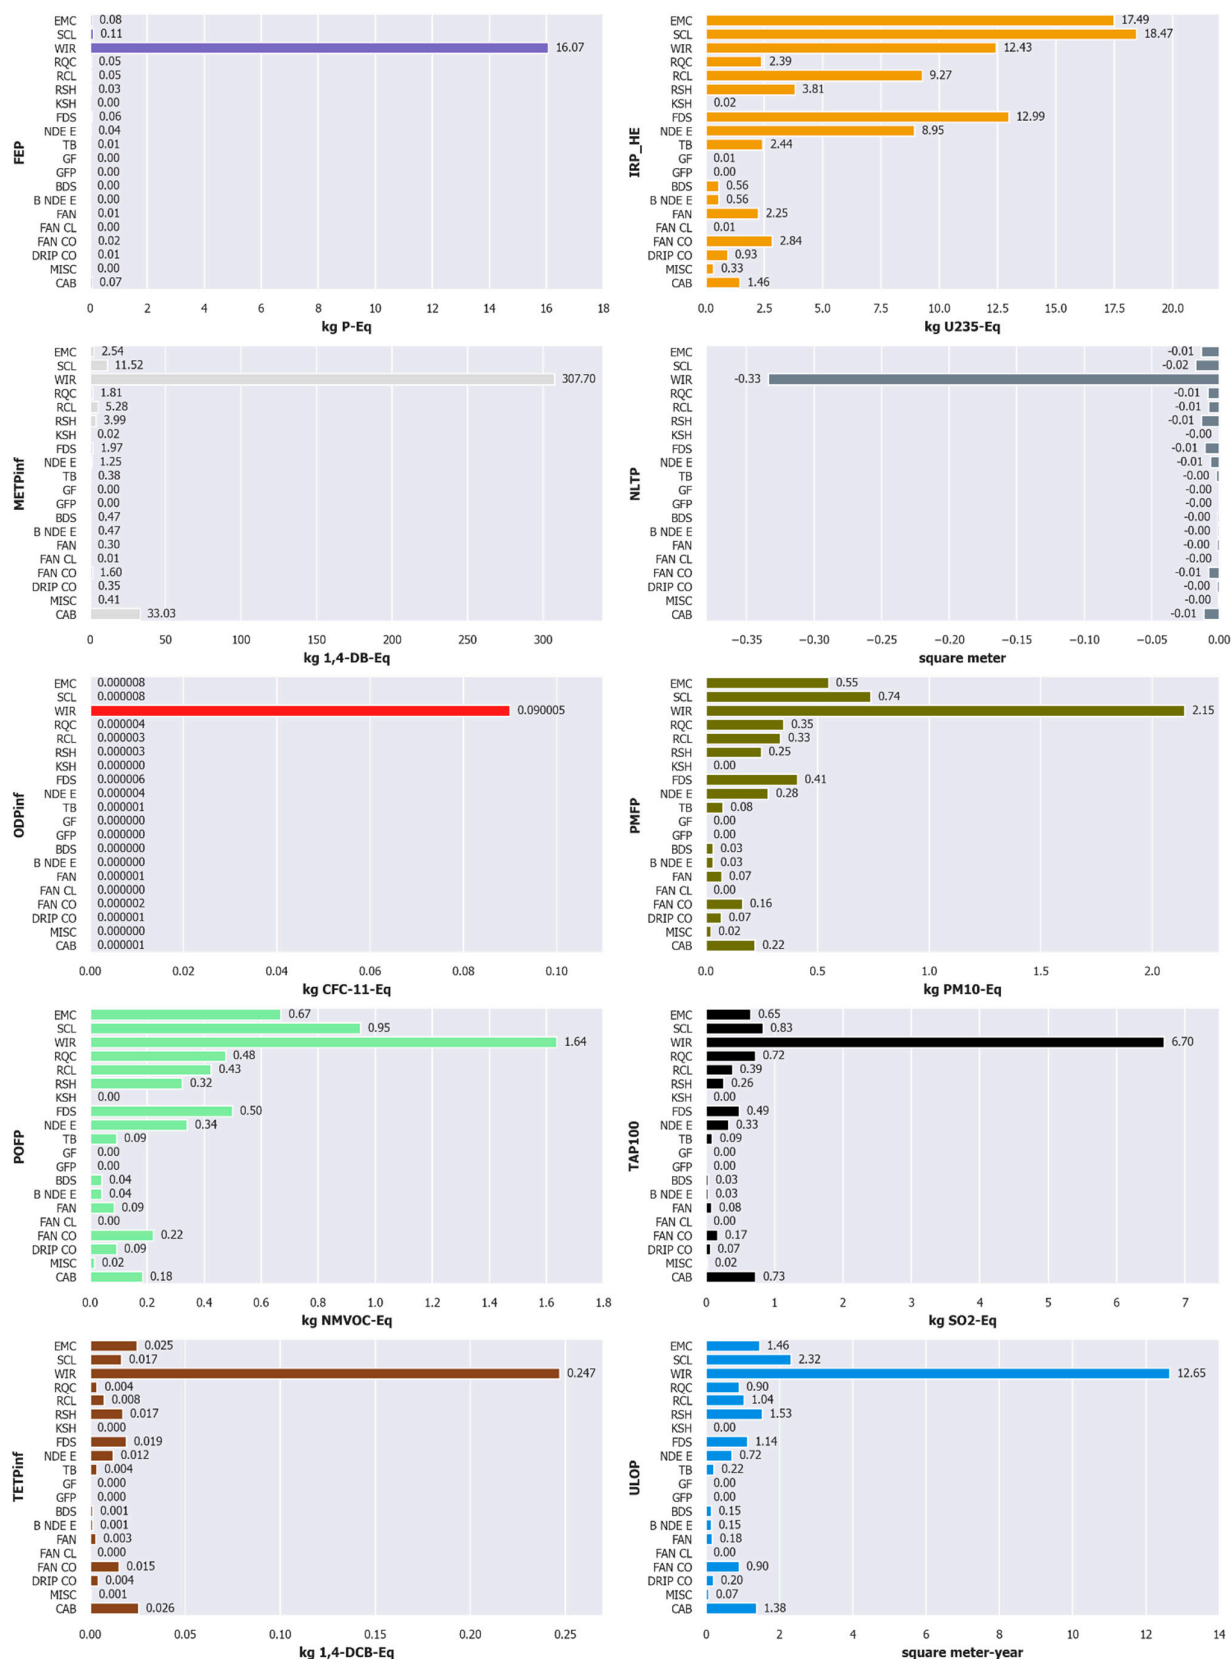

Figure S1. ReCiPe impact category outcomes of AEM's components.
